# Supplementary material
Source: HighWire-hosted journal article supplement (https://www.jpn.ca/highwire/filestream/89453/field_highwire_adjunct_files/0/jpn-160219-1-at.pdf)

**Appendix 1** to Gao X, Zhang W, Yao L, et al. Association between structural and functional brain alterations in drug-free patients with schizophrenia: a multimodal meta-analysis. *J Psychiatry Neurosci* 2017.  
DOI: 10.1503/jpn.160219

Copyright © 2017 The Author(s) or their employer(s). To receive this resource in an accessible format, please contact us at [cmajgroup@cmaj.ca](mailto:cmajgroup@cmaj.ca).

*Online appendices are unedited and posted as supplied by the authors.*

## **Table S1**

### Imaging Methodology Quality Assessment Checklist

---

#### **Category 1: Subjects**

1. Patients were evaluated prospectively, specific diagnostic criteria were applied, and demographic data was reported
2. Healthy comparison subjects were evaluated prospectively, psychiatric and medical illnesses were excluded, and demographic data was reported
3. Important variables (e.g. illness duration, severity of illness, drug status, non-drug therapy status) were checked either by stratification or statistically
4. Sample size per group > 10, and no significant difference in age and sex existed

---

#### **Category 2: Methods for image acquisition and analysis**

5. Magnet strength at least 1.5T
  6. Whole brain analysis was automated with no a-priori regional selection
-

**Appendix 1** to Gao X, Zhang W, Yao L, et al. Association between structural and functional brain alterations in drug-free patients with schizophrenia: a multimodal meta-analysis. *J Psychiatry Neurosci* 2017.  
DOI: 10.1503/jpn.160219

*Online appendices are unedited and posted as supplied by the authors.*

---

7. Coordinates reported in a standard space

8. The imaging technique used was clearly described so as it could be reproduced

9. Measurements were clearly described so that they could be reproduced

10. Results have been corrected for multiple comparison

---

**Category 3: Results and conclusions**

---

11. Statistical parameters for significant and important non-significant differences were provided

12. Conclusions were consistent with the results obtained and the limitations were discussed

---

**Appendix 1** to Gao X, Zhang W, Yao L, et al. Association between structural and functional brain alterations in drug-free patients with schizophrenia: a multimodal meta-analysis. *J Psychiatry Neurosci* 2017.  
 DOI: 10.1503/jpn.160219

*Online appendices are unedited and posted as supplied by the authors.*

**Table S2**

Meta-analysis results of structural MRI

|                                                                       | MNI         | SDM-Z  | P           | Voxels | Cluster breakdown (number of voxels)                                                                                                              |
|-----------------------------------------------------------------------|-------------|--------|-------------|--------|---------------------------------------------------------------------------------------------------------------------------------------------------|
| <b>Cluster of decreased gray matter volume (patients&lt;controls)</b> |             |        |             |        |                                                                                                                                                   |
| Left fusiform gyrus                                                   | -26,-54,-16 | -2.584 | 0.000154853 | 771    | Left fusiform gyrus (382)<br><br>Left cerebellum, hemispheric lobule VI (182)<br><br>Left parahippocampal gyrus (21)<br><br>Left hippocampus (15) |
| Left inferior frontal gyrus                                           | -46,16,0    | -2.497 | 0.00023222  | 649    | Left inferior frontal gyrus (314)<br><br>Left insula (166)                                                                                        |

**Appendix 1** to Gao X, Zhang W, Yao L, et al. Association between structural and functional brain alterations in drug-free patients with schizophrenia: a multimodal meta-analysis. *J Psychiatry Neurosci* 2017.  
 DOI: 10.1503/jpn.160219

*Online appendices are unedited and posted as supplied by the authors.*

|                               |            |        |             |     |                                                   |
|-------------------------------|------------|--------|-------------|-----|---------------------------------------------------|
|                               |            |        |             |     | Left temporal pole, superior temporal gyrus (106) |
| Right superior temporal gyrus | 52,-6,-6   | -2.098 | 0.002043664 | 330 | Right superior temporal gyrus (124)               |
|                               |            |        |             |     | Right insula (97)                                 |
|                               |            |        |             |     | Right rolandic operculum (12)                     |
|                               |            |        |             |     | Right middle temporal gyrus (11)                  |
|                               |            |        |             |     | Right temporal pole, superior temporal gyrus (10) |
| Left supramarginal gyrus      | -56,-40,36 | -2.387 | 0.000490248 | 293 | Left supramarginal gyrus (117)                    |
|                               |            |        |             |     | Left inferior parietal gyrus (104)                |
|                               |            |        |             |     | Left superior temporal gyrus (64)                 |

**Cluster of increased gray matter volume (patients>controls)**

|                     |          |       |             |     |                                    |
|---------------------|----------|-------|-------------|-----|------------------------------------|
| Right lingual gyrus | 6,-34,-6 | 1.895 | 0.000005186 | 466 | Right lingual gyrus (62)           |
|                     |          |       |             |     | Cerebellum, vermic lobule III (36) |

**Appendix 1** to Gao X, Zhang W, Yao L, et al. Association between structural and functional brain alterations in drug-free patients with schizophrenia: a multimodal meta-analysis. *J Psychiatry Neurosci* 2017.  
DOI: 10.1503/jpn.160219

*Online appendices are unedited and posted as supplied by the authors.*

|                                            |          |       |             |     |                                               |
|--------------------------------------------|----------|-------|-------------|-----|-----------------------------------------------|
|                                            |          |       |             |     | Left cerebellum, hemispheric lobule IV/V (31) |
|                                            |          |       |             |     | Left lingual gyrus (18)                       |
| Right superior frontal gyrus, orbital part | 6,60,-22 | 1.617 | 0.000805080 | 155 | Right gyrus rectus (79)                       |
|                                            |          |       |             |     | Right superior frontal gyrus (38)             |

---

(a) Voxel probability threshold:  $P=0.005$

(b) Peak height threshold:  $z=1$

(c) Cluster extent threshold: 100 voxels. Regions with less than 10 voxels are not reported in the cluster breakdown.

**Appendix 1** to Gao X, Zhang W, Yao L, et al. Association between structural and functional brain alterations in drug-free patients with schizophrenia: a multimodal meta-analysis. *J Psychiatry Neurosci* 2017.  
DOI: 10.1503/jpn.160219

*Online appendices are unedited and posted as supplied by the authors.*

### Table S3

Analyses of subgroups and sensitivity analyses of structural studies

| Subgroup analysis                                                | Increased gray matter volume |                        | Decreased gray matter volume |               |                |                    |
|------------------------------------------------------------------|------------------------------|------------------------|------------------------------|---------------|----------------|--------------------|
|                                                                  | Right lingual                | Right superior frontal | Left fusiform                | Left inferior | Right superior | Left supramarginal |
|                                                                  | gyrus                        | gyrus                  | gyrus                        | frontal gyrus | temporal gyrus | gyrus              |
| Studies with slice thickness $\leq$ 1.5 mm at acquisition (n=13) | YES                          | YES                    | NO                           | NO            | YES            | YES                |
| Studies using $\leq$ 8 mm smoothing kernel (n=10)                | YES                          | YES                    | YES                          | NO            | NO             | YES                |
| Studies using 1.5T MRI (n=10)                                    | NO                           | NO                     | YES                          | YES           | YES            | NO                 |
| Studies with an additional correction step (n=9)                 | YES                          | YES                    | YES                          | YES           | YES            | YES                |
| Studies of drug-naive patients (n=14)                            | YES                          | YES                    | YES                          | YES           | YES            | YES                |

**Appendix 1** to Gao X, Zhang W, Yao L, et al. Association between structural and functional brain alterations in drug-free patients with schizophrenia: a multimodal meta-analysis. *J Psychiatry Neurosci* 2017.  
DOI: 10.1503/jpn.160219

*Online appendices are unedited and posted as supplied by the authors.*

---

**Jackknife sensitivity analysis, discarded study**

---

|                        |     |     |     |     |     |     |
|------------------------|-----|-----|-----|-----|-----|-----|
| 2003Salgado-Pineda     | YES | YES | YES | YES | YES | YES |
| 2005Jayakumar          | YES | YES | YES | YES | YES | YES |
| 2007Prasad             | YES | YES | YES | YES | YES | YES |
| 2007Chua               | YES | YES | YES | YES | YES | YES |
| 2008Meda               | YES | YES | YES | YES | YES | YES |
| 2008Witthaus           | YES | YES | YES | YES | YES | YES |
| 2010Venkatasubramanian | YES | YES | YES | YES | YES | YES |
| 2011Berge              | YES | YES | YES | YES | YES | YES |
| 2013Suazo              | YES | YES | YES | YES | YES | YES |
| 2013WentingRen         | YES | YES | YES | YES | YES | YES |

**Appendix 1** to Gao X, Zhang W, Yao L, et al. Association between structural and functional brain alterations in drug-free patients with schizophrenia: a multimodal meta-analysis. *J Psychiatry Neurosci* 2017.  
DOI: 10.1503/jpn.160219

*Online appendices are unedited and posted as supplied by the authors.*

|                    |     |     |     |     |     |     |
|--------------------|-----|-----|-----|-----|-----|-----|
| 2013XiaofengGuo(S) | YES | YES | YES | YES | YES | YES |
| 2013XiaofengGuo(L) | YES | YES | YES | YES | YES | YES |
| 2014WenbinGuo      | YES | YES | YES | YES | YES | YES |
| 2014JunLi          | YES | YES | YES | YES | YES | YES |
| 2014Nenadic        | YES | YES | YES | YES | YES | YES |
| 2016Yue            | YES | YES | YES | YES | YES | YES |

---



**Appendix 1** to Gao X, Zhang W, Yao L, et al. Association between structural and functional brain alterations in drug-free patients with schizophrenia: a multimodal meta-analysis. *J Psychiatry Neurosci* 2017.  
DOI: 10.1503/jpn.160219

*Online appendices are unedited and posted as supplied by the authors.*

**Table S4**

Meta-analysis results of functional MRI

|                                                         | MNI       | SDM-Z  | P           | Voxels | Cluster breakdown (number of voxels)                                                                                                                                        |
|---------------------------------------------------------|-----------|--------|-------------|--------|-----------------------------------------------------------------------------------------------------------------------------------------------------------------------------|
| <b>Cluster of hypoactivation (patients&lt;controls)</b> |           |        |             |        |                                                                                                                                                                             |
| Right inferior frontal gyrus, opercular part            | 46,10,30  | -3.221 | 0.000006437 | 893    | Right inferior frontal gyrus, opercular part (432)<br>Right inferior frontal gyrus, triangular part (152)<br>Right precentral gyrus (98)<br>Right middle frontal gyrus (17) |
| Right angular gyrus                                     | 40,-60,52 | -2.719 | 0.000062704 | 331    | Right angular gyrus (166)<br>Right inferior parietal (excluding supramarginal and angular) gyrus (140)                                                                      |

**Appendix 1** to Gao X, Zhang W, Yao L, et al. Association between structural and functional brain alterations in drug-free patients with schizophrenia: a multimodal meta-analysis. *J Psychiatry Neurosci* 2017.  
 DOI: 10.1503/jpn.160219

*Online appendices are unedited and posted as supplied by the authors.*

Right superior parietal gyrus (25)

|              |           |        |             |     |                    |
|--------------|-----------|--------|-------------|-----|--------------------|
| Right insula | 38,14,-14 | -2.439 | 0.000266016 | 339 | Right insula (197) |
|--------------|-----------|--------|-------------|-----|--------------------|

Right inferior frontal gyrus, orbital part (44)

Right temporal pole, superior temporal gyrus (30)

**Cluster of hyperactivation (patients>controls)**

|               |          |       |    |      |                                    |
|---------------|----------|-------|----|------|------------------------------------|
| Left striatum | -28,-2,4 | 3.273 | ~0 | 2761 | Left superior temporal gyrus (685) |
|---------------|----------|-------|----|------|------------------------------------|

Left insula (564)

Left rolandic operculum (335)

Left lenticular nucleus, putamen (296)

Left striatum (189)

Left heschl gyrus (164)

Left postcentral gyrus (69)

**Appendix 1** to Gao X, Zhang W, Yao L, et al. Association between structural and functional brain alterations in drug-free patients with schizophrenia: a multimodal meta-analysis. *J Psychiatry Neurosci* 2017.  
 DOI: 10.1503/jpn.160219

*Online appendices are unedited and posted as supplied by the authors.*

|                               |             |       |             |     |                                        |
|-------------------------------|-------------|-------|-------------|-----|----------------------------------------|
|                               |             |       |             |     | Left supramarginal gyrus (44)          |
|                               |             |       |             |     | Left pons (17)                         |
| Right striatum                | 26,-2,8     | 1.919 | 0.000929713 | 212 | Right insula (71)                      |
|                               |             |       |             |     | Right striatum (48)                    |
|                               |             |       |             |     | Right lenticular nucleus, putamen (34) |
| Left inferior occipital gyrus | -34,-76,-12 | 2.178 | 0.000299335 | 168 | Left fusiform gyrus (83)               |
|                               |             |       |             |     | Left inferior occipital gyrus (42)     |

(a) Voxel probability threshold:  $P=0.005$

(b) Peak height threshold:  $z=1$

(c) Cluster extent threshold: 100 voxels. Regions with less than 10 voxels are not reported in the cluster breakdown.

**Appendix 1** to Gao X, Zhang W, Yao L, et al. Association between structural and functional brain alterations in drug-free patients with schizophrenia: a multimodal meta-analysis. *J Psychiatry Neurosci* 2017.  
DOI: 10.1503/jpn.160219

*Online appendices are unedited and posted as supplied by the authors.*

**Table S5**

Analyses of subgroups and sensitivity analyses of functional studies

| Subgroup analysis                                        | Hyperactivation |                |                               | Hypoactivation                               |                     |              |
|----------------------------------------------------------|-----------------|----------------|-------------------------------|----------------------------------------------|---------------------|--------------|
|                                                          | Left striatum   | Right striatum | Left inferior occipital gyrus | Right inferior frontal gyrus, opercular part | Right angular gyrus | Right insula |
| Studies with slice thickness <5 mm at acquisition (n=13) | YES             | NO             | NO                            | YES                                          | NO                  | YES          |
| Studies using $\geq 8$ mm smoothing kernel (n=15)        | YES             | YES            | YES                           | YES                                          | YES                 | YES          |
| Studies using 1.5T MRI (n=8)                             | YES             | NO             | NO                            | YES                                          | NO                  | NO           |
| Studies with an additional correction step (n=16)        | YES             | YES            | YES                           | YES                                          | YES                 | YES          |
| Studies performing task (n=11)                           | YES             | NO             | NO                            | YES                                          | NO                  | YES          |

**Appendix 1** to Gao X, Zhang W, Yao L, et al. Association between structural and functional brain alterations in drug-free patients with schizophrenia: a multimodal meta-analysis. *J Psychiatry Neurosci* 2017.  
 DOI: 10.1503/jpn.160219

*Online appendices are unedited and posted as supplied by the authors.*

| Studies of drug-naive patients (n=8)                   | YES | YES | YES | YES | YES | NO  |
|--------------------------------------------------------|-----|-----|-----|-----|-----|-----|
| <b>Jackknife sensitivity analysis, discarded study</b> |     |     |     |     |     |     |
| 1997Andreason                                          | YES | YES | YES | YES | YES | YES |
| 2010Scheef                                             | YES | YES | YES | YES | YES | YES |
| 2013Ren                                                | YES | NO  | NO  | YES | NO  | YES |
| 2015Guo                                                | YES | YES | YES | YES | YES | YES |
| 2014 Hadley                                            | YES | YES | YES | YES | YES | YES |
| 2003Hofer                                              | YES | YES | YES | YES | YES | YES |
| 2004Jones                                              | YES | YES | YES | YES | YES | YES |
| 2005Weiss                                              | YES | YES | YES | YES | YES | YES |
| 2005Boksman                                            | YES | YES | YES | YES | YES | YES |

**Appendix 1** to Gao X, Zhang W, Yao L, et al. Association between structural and functional brain alterations in drug-free patients with schizophrenia: a multimodal meta-analysis. *J Psychiatry Neurosci* 2017.  
DOI: 10.1503/jpn.160219

*Online appendices are unedited and posted as supplied by the authors.*

|                          |     |     |     |     |     |     |
|--------------------------|-----|-----|-----|-----|-----|-----|
| 2008Scheuerecker         | YES | YES | YES | YES | YES | YES |
| 2010Comilo               | YES | YES | YES | YES | YES | YES |
| 2011Nejad                | YES | YES | YES | YES | YES | YES |
| 2013Bin                  | YES | YES | YES | YES | YES | YES |
| 2014Schlagenhauf         | YES | YES | YES | YES | YES | YES |
| 2015Lesh                 | YES | YES | YES | YES | YES | YES |
| 2016Zheng                | YES | YES | YES | YES | YES | YES |
| 2016Cui (1) <sup>j</sup> | YES | YES | YES | YES | YES | YES |
| 2016Cui (2)              | YES | YES | YES | YES | YES | YES |

---

**Appendix 1** to Gao X, Zhang W, Yao L, et al. Association between structural and functional brain alterations in drug-free patients with schizophrenia: a multimodal meta-analysis. *J Psychiatry Neurosci* 2017.  
DOI: 10.1503/jpn.160219

*Online appendices are unedited and posted as supplied by the authors.*

**Table S6**

Regions with altered gray matter volume showing significant statistical heterogeneity between studies (voxelwise  $p < 0.005$ )

| Description         | MNI coordinate | SDM-Z | P       | Voxels |
|---------------------|----------------|-------|---------|--------|
| Right insula        | 38,-16,-2      | 4.039 | ~0      | 1372   |
| Left fusiform gyrus | -36,-60,-16    | 2.414 | 0.00026 | 264    |

**Table S7**

Regions with altered regional metabolism showing significant statistical heterogeneity between studies (voxelwise  $p < 0.005$ )

| Description | MNI coordinate | SDM-Z | P       | Voxels |
|-------------|----------------|-------|---------|--------|
| Left insula | -36,-6,10      | 2.209 | 0.00155 | 184    |

**Appendix 1** to Gao X, Zhang W, Yao L, et al. Association between structural and functional brain alterations in drug-free patients with schizophrenia: a multimodal meta-analysis. *J Psychiatry Neurosci* 2017.  
DOI: 10.1503/jpn.160219

*Online appendices are unedited and posted as supplied by the authors.*

**Table S8**

Results of the funnel plots and Eager test

| Brain areas         | Funnel plots                                                                                                                                                                                                                                                                                                                                                                                                                                                                                                                                                                                                                                                                                                                                                                                                                                                                                                     | Eager test         |
|---------------------|------------------------------------------------------------------------------------------------------------------------------------------------------------------------------------------------------------------------------------------------------------------------------------------------------------------------------------------------------------------------------------------------------------------------------------------------------------------------------------------------------------------------------------------------------------------------------------------------------------------------------------------------------------------------------------------------------------------------------------------------------------------------------------------------------------------------------------------------------------------------------------------------------------------|--------------------|
| Left fusiform gyrus | 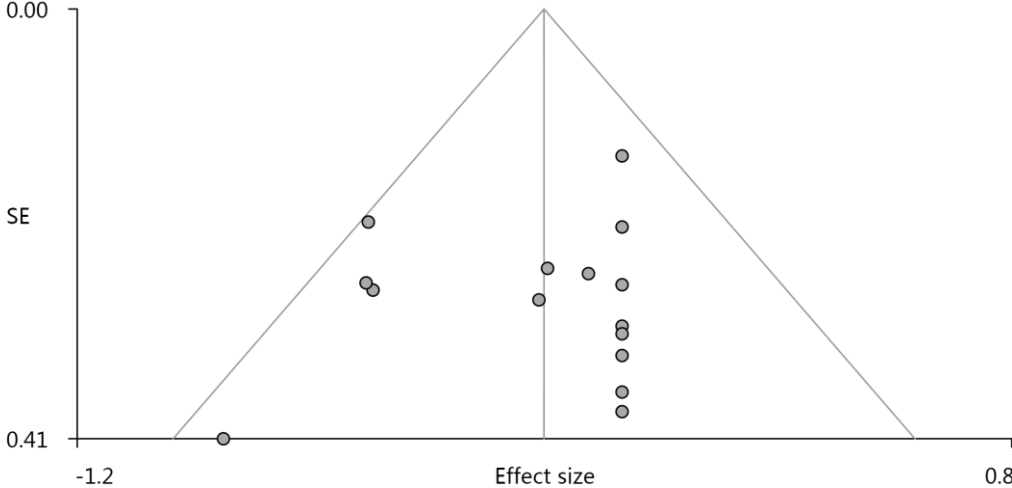 <p>The funnel plot displays 15 individual study effect sizes as grey circles. The plot is centered at 0.00 on the x-axis. The y-axis represents the standard error (SE), ranging from 0.00 at the top to 0.41 at the bottom. The x-axis ranges from -1.2 to 0.8. A vertical line is drawn at 0.00. The data points are distributed as follows: one point at approximately -1.1, two points at approximately -0.8, one point at approximately -0.6, one point at approximately -0.4, one point at approximately -0.2, one point at approximately 0.0, one point at approximately 0.1, one point at approximately 0.2, one point at approximately 0.3, one point at approximately 0.4, one point at approximately 0.5, one point at approximately 0.6, one point at approximately 0.7, and one point at approximately 0.8.</p> | T= -0.74, P= 0.473 |



**Appendix 1** to Gao X, Zhang W, Yao L, et al. Association between structural and functional brain alterations in drug-free patients with schizophrenia: a multimodal meta-analysis. *J Psychiatry Neurosci* 2017.  
DOI: 10.1503/jpn.160219

*Online appendices are unedited and posted as supplied by the authors.*

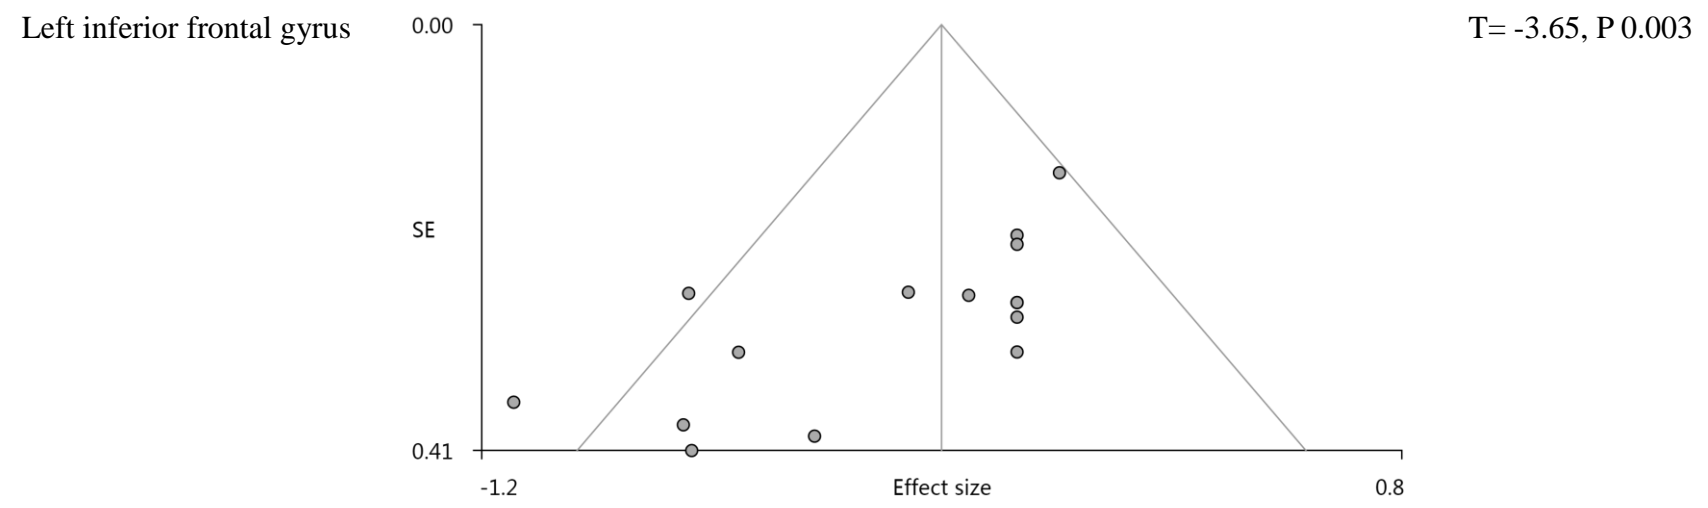

**Appendix 1** to Gao X, Zhang W, Yao L, et al. Association between structural and functional brain alterations in drug-free patients with schizophrenia: a multimodal meta-analysis. *J Psychiatry Neurosci* 2017.  
DOI: 10.1503/jpn.160219

Online appendices are unedited and posted as supplied by the authors.

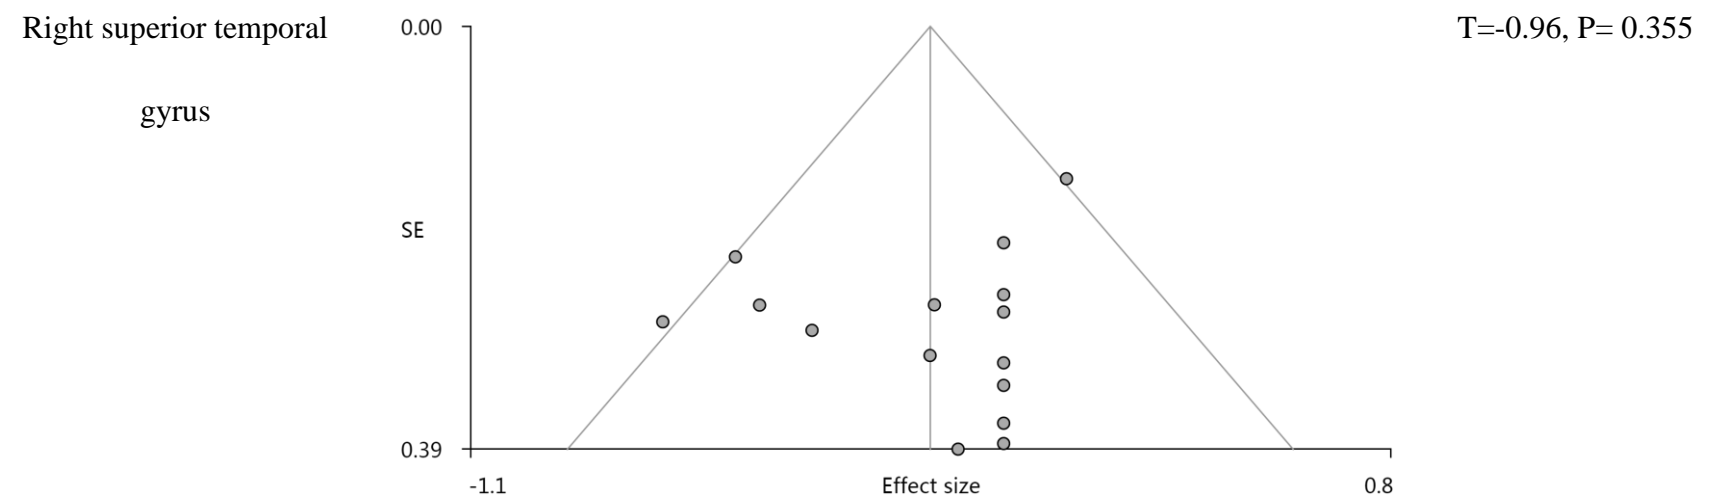

**Appendix 1** to Gao X, Zhang W, Yao L, et al. Association between structural and functional brain alterations in drug-free patients with schizophrenia: a multimodal meta-analysis. *J Psychiatry Neurosci* 2017.  
DOI: 10.1503/jpn.160219

*Online appendices are unedited and posted as supplied by the authors.*

Left supramarginal gyrus

T= 2.56, P= 0.024

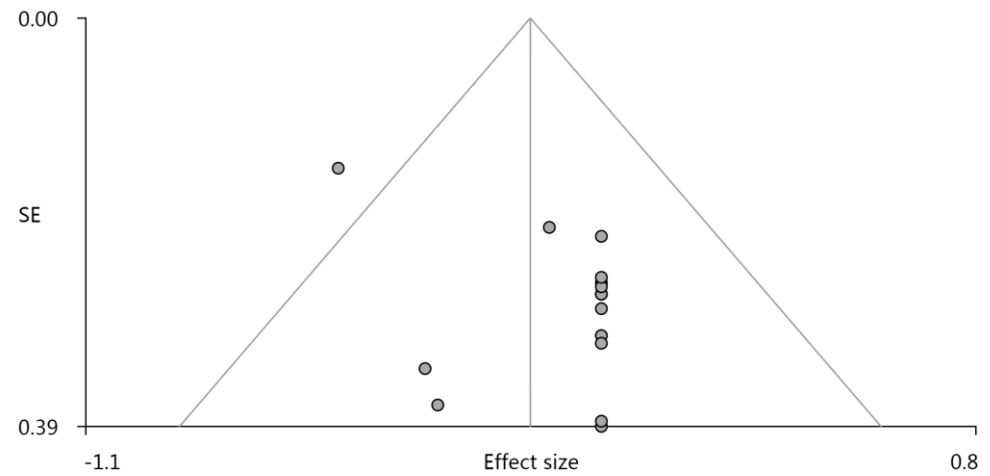

**Appendix 1** to Gao X, Zhang W, Yao L, et al. Association between structural and functional brain alterations in drug-free patients with schizophrenia: a multimodal meta-analysis. *J Psychiatry Neurosci* 2017.  
DOI: 10.1503/jpn.160219

*Online appendices are unedited and posted as supplied by the authors.*

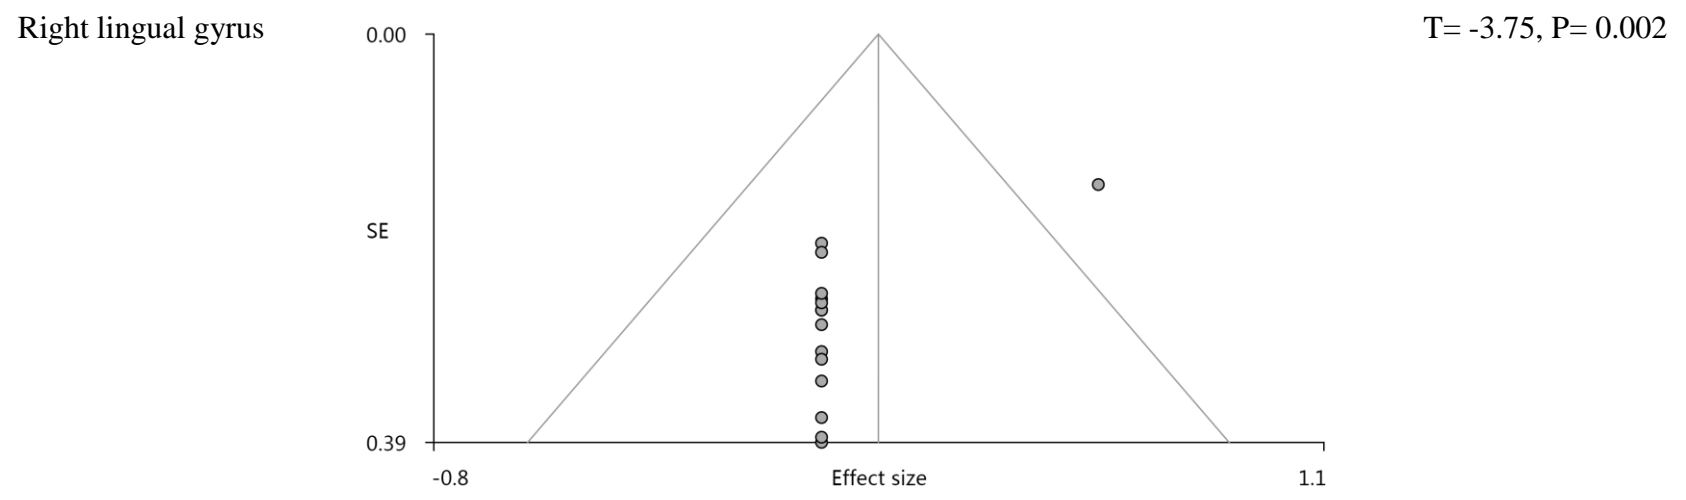

**Appendix 1** to Gao X, Zhang W, Yao L, et al. Association between structural and functional brain alterations in drug-free patients with schizophrenia: a multimodal meta-analysis. *J Psychiatry Neurosci* 2017.  
DOI: 10.1503/jpn.160219

*Online appendices are unedited and posted as supplied by the authors.*

Right superior frontal  
gyrus, orbital part

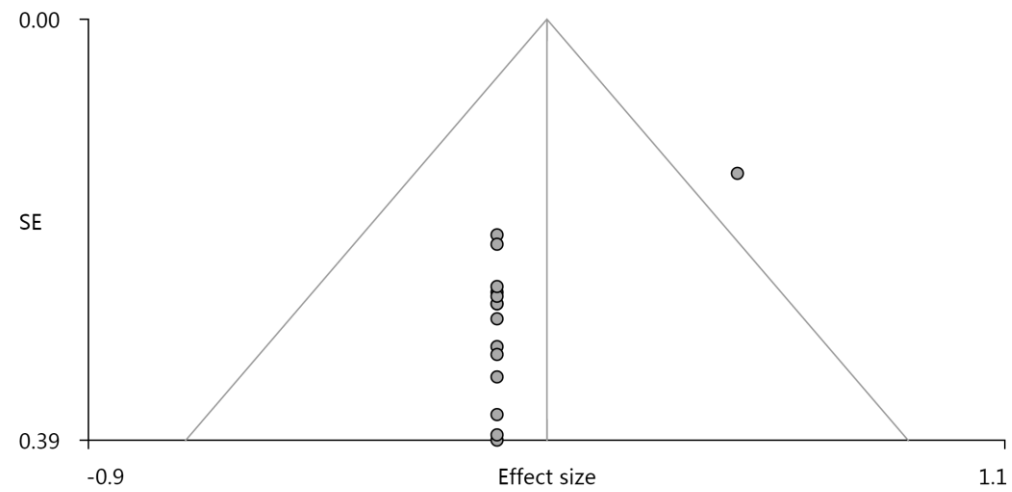

T= -3.80, P= 0.002

**Appendix 1** to Gao X, Zhang W, Yao L, et al. Association between structural and functional brain alterations in drug-free patients with schizophrenia: a multimodal meta-analysis. *J Psychiatry Neurosci* 2017.  
DOI: 10.1503/jpn.160219

*Online appendices are unedited and posted as supplied by the authors.*

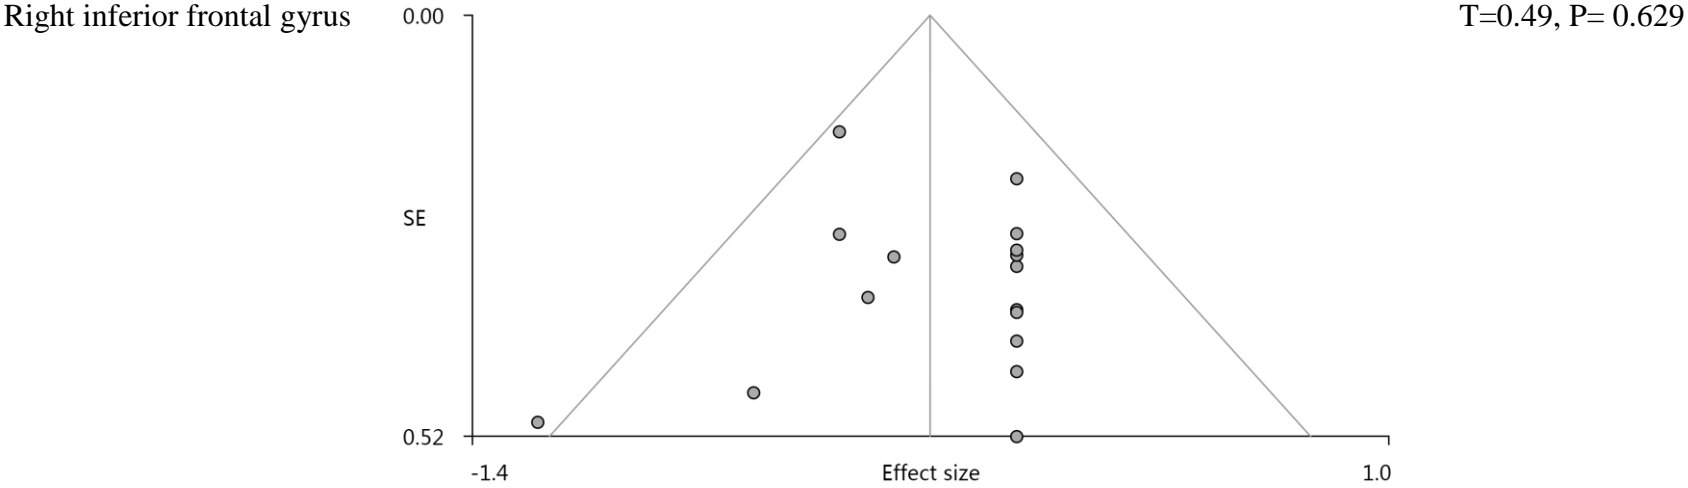

**Appendix 1** to Gao X, Zhang W, Yao L, et al. Association between structural and functional brain alterations in drug-free patients with schizophrenia: a multimodal meta-analysis. *J Psychiatry Neurosci* 2017.  
DOI: 10.1503/jpn.160219

*Online appendices are unedited and posted as supplied by the authors.*

Right angular gyrus

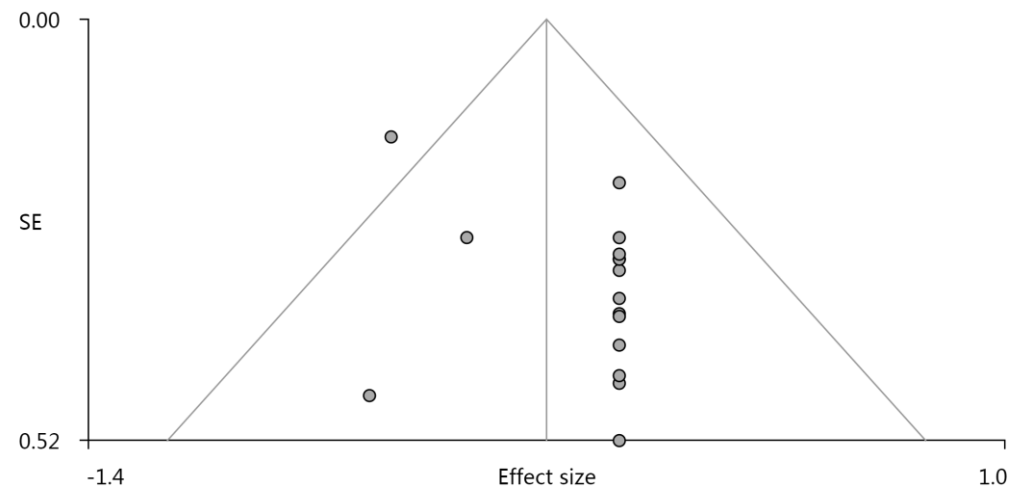

T= 2.63, P= 0.020

**Appendix 1** to Gao X, Zhang W, Yao L, et al. Association between structural and functional brain alterations in drug-free patients with schizophrenia: a multimodal meta-analysis. *J Psychiatry Neurosci* 2017.  
DOI: 10.1503/jpn.160219

*Online appendices are unedited and posted as supplied by the authors.*

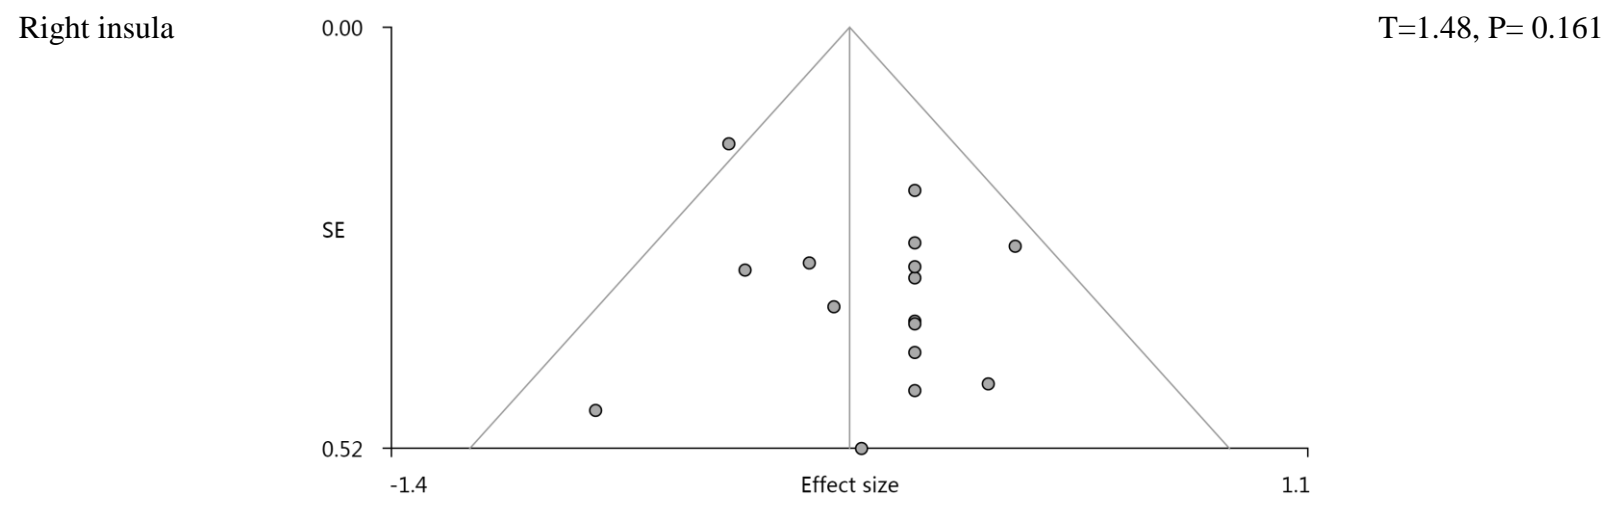



**Appendix 1** to Gao X, Zhang W, Yao L, et al. Association between structural and functional brain alterations in drug-free patients with schizophrenia: a multimodal meta-analysis. *J Psychiatry Neurosci* 2017.  
DOI: 10.1503/jpn.160219

*Online appendices are unedited and posted as supplied by the authors.*

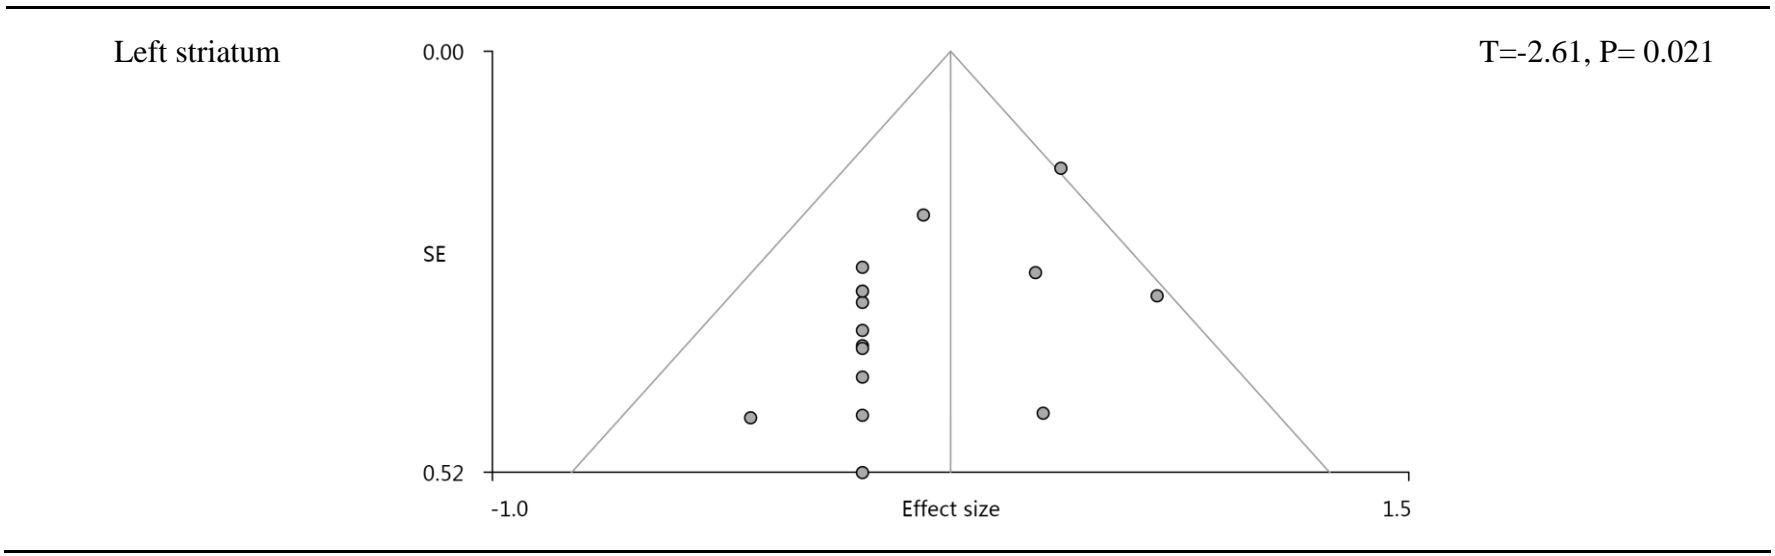

**Appendix 1** to Gao X, Zhang W, Yao L, et al. Association between structural and functional brain alterations in drug-free patients with schizophrenia: a multimodal meta-analysis. *J Psychiatry Neurosci* 2017.  
DOI: 10.1503/jpn.160219

*Online appendices are unedited and posted as supplied by the authors.*

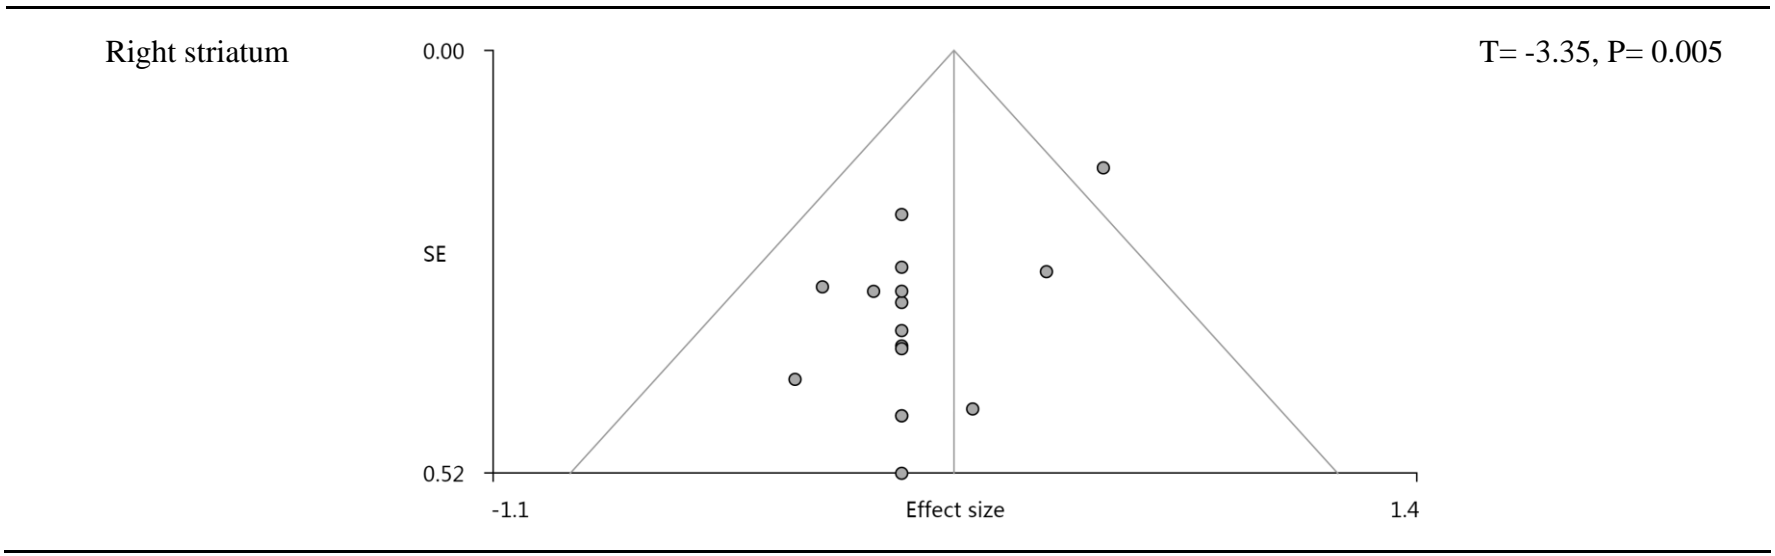

**Appendix 1** to Gao X, Zhang W, Yao L, et al. Association between structural and functional brain alterations in drug-free patients with schizophrenia: a multimodal meta-analysis. *J Psychiatry Neurosci* 2017.  
DOI: 10.1503/jpn.160219

*Online appendices are unedited and posted as supplied by the authors.*

Left inferior occipital  
gyrus

T=-3.61, P= 0.003

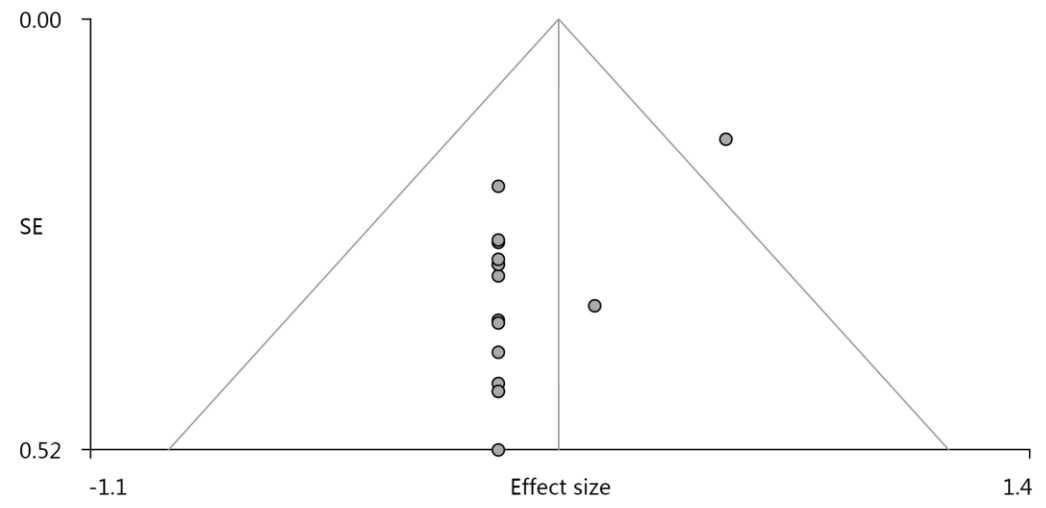

**Appendix 1** to Gao X, Zhang W, Yao L, et al. Association between structural and functional brain alterations in drug-free patients with schizophrenia: a multimodal meta-analysis. *J Psychiatry Neurosci* 2017.  
DOI: 10.1503/jpn.160219

*Online appendices are unedited and posted as supplied by the authors.*

### **References of the inclusion studies<sup>1-29</sup>:**

1. Salgado-Pineda P, Baeza I, Pérez-Gómez M, et al. Sustained attention impairment correlates to gray matter decreases in first episode neuroleptic-naive schizophrenic patients[J]. *NeuroImage* 2003,19(2):365-375.
2. Jayakumar PN, Venkatasubramanian G, Gangadhar BN, et al. Optimized voxel-based morphometry of gray matter volume in first-episode, antipsychotic-naive schizophrenia[J]. *Progress in neuro-psychopharmacology & biological psychiatry* 2005,29(4):587-591.
3. Chua SE, Cheung C, Cheung V, et al. Cerebral grey, white matter and csf in never-medicated, first-episode schizophrenia[J]. *Schizophrenia research* 2007,89(1-3):12-21.
4. Prasad KM, Shirts BH, Yolken RH, et al. Brain morphological changes associated with exposure to HSV1 in first-episode schizophrenia[J]. *Molecular psychiatry* 2007,12(1):105-113, 101.
5. Meda SA, Giuliani NR, Calhoun VD, et al. A large scale (N=400) investigation of gray matter differences in schizophrenia using optimized voxel-based morphometry[J]. *Schizophrenia research* 2008,101(1-3):95-105.
6. Witthaus H, Kaufmann C Fau - Bohner G, Bohner G Fau - Ozgurdal S, et al. Gray matter abnormalities in subjects at ultra-high risk for schizophrenia and first-episode schizophrenic patients compared to healthy controls[J]. (0165-1781 (Print)).
7. Venkatasubramanian G. Neuroanatomical correlates of psychopathology in antipsychotic-naive schizophrenia[J]. *Indian journal of psychiatry* 2010,52(1):28-36.
8. Berge D, Carmona S, Rovira M, et al. Gray matter volume deficits and correlation with insight and negative symptoms in first-psychotic-episode subjects[J]. *Acta psychiatrica Scandinavica* 2011,123(6):431-439.
9. Suazo V, Diez A, Montes C, et al. Structural correlates of cognitive deficit and elevated gamma noise power in schizophrenia[J]. *Psychiatry and clinical neurosciences* 2014,68(3):206-215.
10. Ren W, Lui S, Deng W, et al. Anatomical and functional brain abnormalities in drug-naive first-episode schizophrenia[J]. *The American journal of psychiatry* 2013,170(11):1308-1316.
11. Guo X, Li J, Wei Q, et al. Duration of untreated psychosis is associated with temporal and occipitotemporal gray matter volume decrease in treatment naive

**Appendix 1** to Gao X, Zhang W, Yao L, et al. Association between structural and functional brain alterations in drug-free patients with schizophrenia: a multimodal meta-analysis. *J Psychiatry Neurosci* 2017.  
DOI: 10.1503/jpn.160219

*Online appendices are unedited and posted as supplied by the authors.*

- schizophrenia[J]. *PloS one* 2013,8(12):e83679.
12. Guo W, Liu F, Xiao C, et al. Dissociation of anatomical and functional alterations of the default-mode network in first-episode, drug-naive schizophrenia[J]. *Clin Neurophysiol* 2015.
  13. Guo X, Li J, Wang J, et al. Hippocampal and orbital inferior frontal gray matter volume abnormalities and cognitive deficit in treatment-naive, first-episode patients with schizophrenia[J]. *Schizophrenia research* 2014,152(2-3):339-343.
  14. Nenadic I, Dietzek M, Schonfeld N, et al. Brain structure in people at ultra-high risk of psychosis, patients with first-episode schizophrenia, and healthy controls: a VBM study[J]. *Schizophrenia research* 2015,161(2-3):169-176.
  15. Scheef L, Manka C, Daamen M, et al. Resting-state perfusion in nonmedicated schizophrenic patients: a continuous arterial spin-labeling 3.0-T MR study[J]. *Radiology* 2010,256(1):253-260.
  16. Hadley JA, Nenert R, Kraguljac NV, et al. Ventral tegmental area/midbrain functional connectivity and response to antipsychotic medication in schizophrenia[J]. *Neuropsychopharmacology : official publication of the American College of Neuropsychopharmacology* 2014,39(4):1020-1030.
  17. Hofer A, Weiss EM, Golaszewski SM, et al. Neural correlates of episodic encoding and recognition of words in unmedicated patients during an acute episode of schizophrenia: a functional MRI study[J]. *The American journal of psychiatry* 2003,160(10):1802-1808.
  18. Jones HM, Brammer MJ, O'Toole M, et al. Cortical effects of quetiapine in first-episode schizophrenia: a preliminary functional magnetic resonance imaging study[J]. *Biological psychiatry* 2004,56(12):938-942.
  19. Boksman K, Theberge J, Williamson P, et al. A 4.0-T fMRI study of brain connectivity during word fluency in first-episode schizophrenia[J]. *Schizophrenia research* 2005,75(2-3):247-263.
  20. Weiss EM, Siedentopf C, Golaszewski S, et al. Brain activation patterns during a selective attention test--a functional MRI study in healthy volunteers and unmedicated patients during an acute episode of schizophrenia[J]. *Psychiatry research* 2007,154(1):31-40.
  21. Scheuerecker J, Ufer S, Zipse M, et al. Cerebral changes and cognitive dysfunctions in medication-free schizophrenia - an fMRI study[J]. *Journal of psychiatric research* 2008,42(6):469-476.
  22. De la Fuente-Sandoval C, Favila R, Gomez-Martin D, et al. Functional magnetic resonance imaging response to experimental pain in drug-free patients with schizophrenia[J]. *Psychiatry research* 2010,183(2):99-104.
  23. Nejad AB, Ebdrup BH, Siebner HR, et al. Impaired temporoparietal deactivation with working memory load in antipsychotic-naive patients with first-episode

**Appendix 1** to Gao X, Zhang W, Yao L, et al. Association between structural and functional brain alterations in drug-free patients with schizophrenia: a multimodal meta-analysis. *J Psychiatry Neurosci* 2017.  
DOI: 10.1503/jpn.160219

*Online appendices are unedited and posted as supplied by the authors.*

- schizophrenia[J]. *The world journal of biological psychiatry : the official journal of the World Federation of Societies of Biological Psychiatry* 2011,12(4):271-281.
24. Ji B, Mei W, Zhang JX, et al. Abnormal auditory sensory gating-out in first-episode and never-medicated paranoid schizophrenia patients: an fMRI study[J]. *Experimental brain research* 2013,229(2):139-147.
  25. Schlagenhaut F, Huys QJ, Deserno L, et al. Striatal dysfunction during reversal learning in unmedicated schizophrenia patients[J]. *Neuroimage* 2014,89:171-180.
  26. Lesh TA, Tanase C, Geib BR, et al. A multimodal analysis of antipsychotic effects on brain structure and function in first-episode schizophrenia[J]. *JAMA psychiatry* 2015,72(3):226-234.
  27. Yue Y, Kong L, Wang J, et al. Regional Abnormality of Grey Matter in Schizophrenia: Effect from the Illness or Treatment?[J]. *PloS one* 2016,11(1):e0147204.
  28. Cui LB, Liu K, Li C, et al. Putamen-related regional and network functional deficits in first-episode schizophrenia with auditory verbal hallucinations[J]. *Schizophrenia research* 2016,173(1-2):13-22.
  29. Zheng J, Zhang Y, Guo X, et al. Disrupted amplitude of low-frequency fluctuations in antipsychotic-naïve adolescents with early-onset schizophrenia[J]. *Psychiatry research* 2016,249:20-26.

**Appendix 1** to Gao X, Zhang W, Yao L, et al. Association between structural and functional brain alterations in drug-free patients with schizophrenia: a multimodal meta-analysis. *J Psychiatry Neurosci* 2017.  
 DOI: 10.1503/jpn.160219

*Online appendices are unedited and posted as supplied by the authors.*

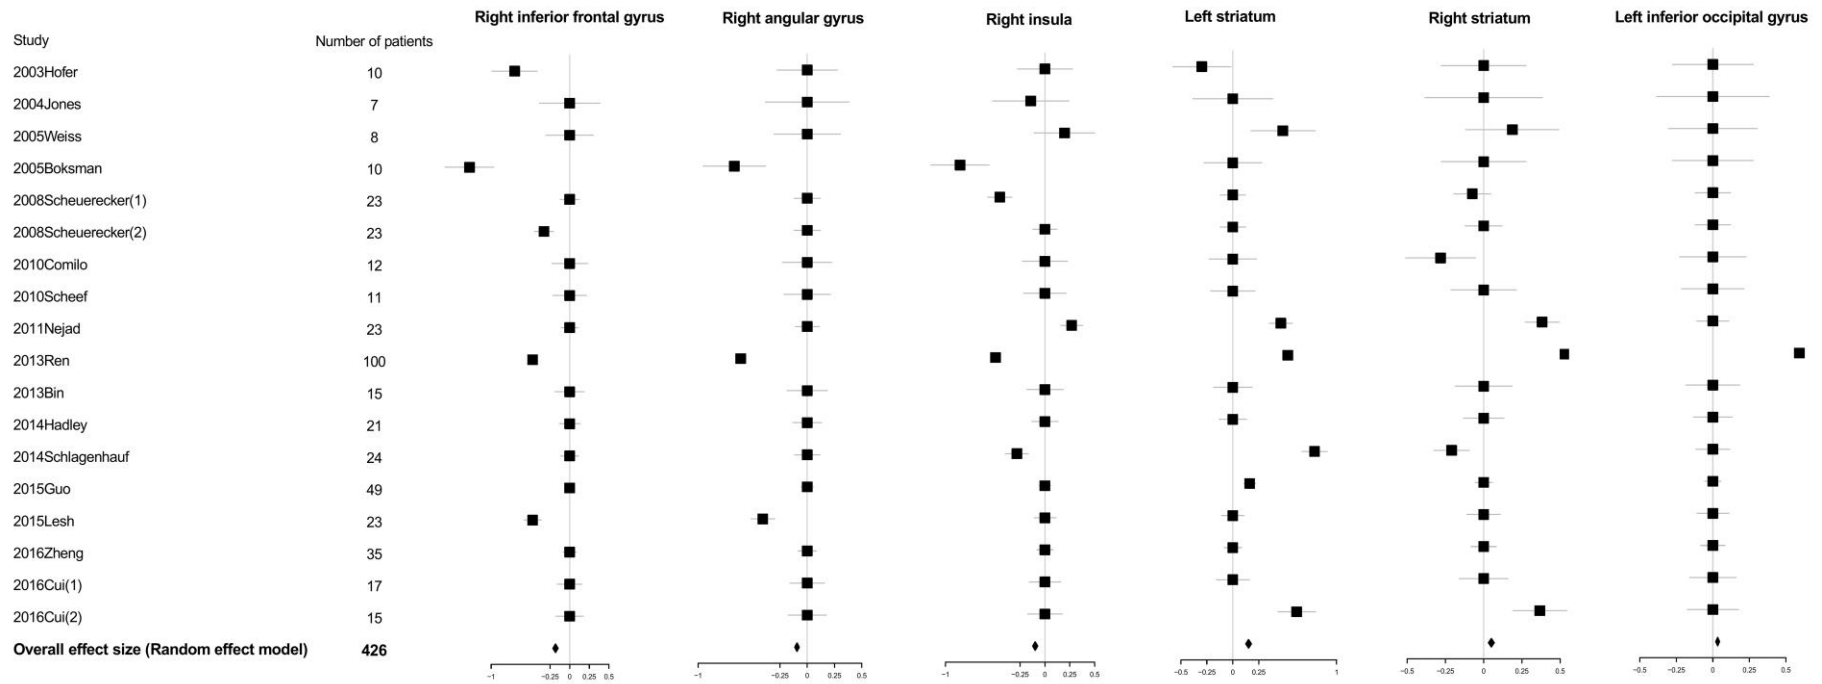

**Appendix 1** to Gao X, Zhang W, Yao L, et al. Association between structural and functional brain alterations in drug-free patients with schizophrenia: a multimodal meta-analysis. *J Psychiatry Neurosci* 2017.  
 DOI: 10.1503/jpn.160219

*Online appendices are unedited and posted as supplied by the authors.*

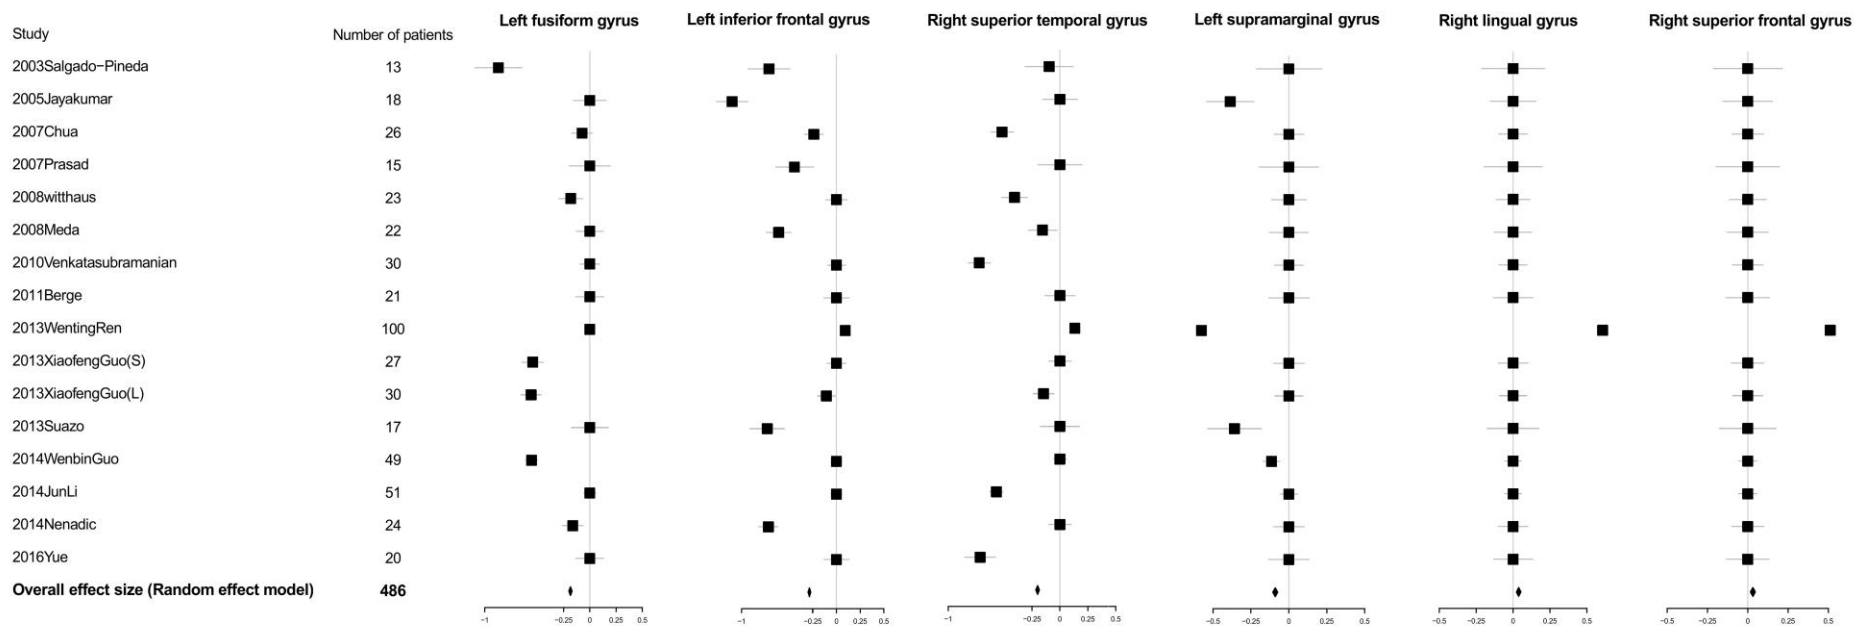

Supplement: jpn-160219-1-at.pdf [file jpn-160219-1-at.pdf]
